# Supplementary material
Source: Springer Nature journal article supplement (https://www.springermedizin.de/resource/supplementary/12874_2007_233_MOESM1_ESM.pdf/9434048)
Supplement: MOESM1 [file 9434048]

GERAC cohort group (only patients from 09/2003 to 12/2003 included) N = 105,000

Referred by GP or other due to migraine or tension-type headache, age ≥ 18, 6-10 treatments

Subgroup N = 2993

Informed Consent ?

No N=930

Time limit exceeded N= 662

Exclusion N = 314

Re-evaluation of inclusion criteria by interviewer / patient  
Drop out due to other reasons

Excluded after Randomisation 264

Study group N = 1087

Randomisation

group A1  
n= 258

Information at outset

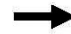

telephone interview  
n = 211

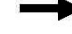

self-administered  
n=196

group A2  
n= 268

Information delayed

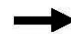

telephone interview  
n=223

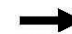

self-administered  
n= 203

group B1  
n= 281

Information at outset

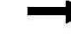

self-administered  
n=225

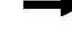

telephone interview  
n=211

group B2  
n=280

Information delayed

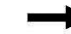

self-administered  
n=229

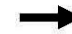

telephone interview  
n=213
